# Supplementary material for: Performance of the first commercial dual resistance assay, AmpliSens Mycoplasma genitalium-ML/FQ-Resist-FL, for detection of potential macrolide and quinolone resistance-associated mutations and prevalence of M. genitalium resistance mutations in St. Petersburg, Russia
Source: PubMed Central journal article supplement — Sex Transm Infect. 2022 Jun 16;99(3):191–4. doi: 10.1136/sextrans-2021-055249 (PMC10176367; doi:10.1136/sextrans-2021-055249), 2022-06-16
Supplement: sextrans-2021-055249supp001.pdf [file sextrans-2021-055249supp001.pdf]

**ABSTRACT in native language**

**Задачи** Резистентность *Mycoplasma genitalium* (MG) к антимикробным препаратам является глобальной проблемой общественного здравоохранения, недостаточно исследуемой и контролируемой. Мы валидировали первый коммерческий тест, AmpliSens *M. genitalium*-ML / FQ-Resist-FL, для одновременного определения мутаций, потенциально ассоциированных с устойчивостью к макролидам и хинолонам (МАРМ и МАРХ, соответственно), и оценили распространенность МАРМ и МАРХ в Санкт-Петербурге (Россия).

**Методы** Урогенитальные пробы, положительные на MG (n = 145; получены в 2007-2020) и отрицательные на MG (n = 56 в 2021) при рутинной диагностике, были ретроспективно проанализированы на МАРМ и МАРХ с использованием теста AmpliSens *M. genitalium*-ML / FQ-Resist-FL (Центральный научно-исследовательский институт эпидемиологии, Москва, Россия) и секвенирования по Сэнгеру для валидации результатов.

**Результаты** Тест AmpliSens *M. genitalium*-ML / FQ-Resist-FL обнаружил потенциальные МАРМ и МАРХ с чувствительностью 100% (CI95% 83,9-100) и 92,3% (CI95% 66,7-99,6) и специфичностью 99,2% (CI95% (95,6-100) и 100% (CI95% 97,2-100), соответственно, в клинических образцах, содержащих  $\geq 1000$  MG ГЭ/мл. В целом, МАРМ были обнаружены в 13,8% (CI95% 9,1–20,3) образцов, при этом наиболее распространенной была мутация в позиции 23S рРНК A2058G (45,0% [CI95% 25,8–65,8]). МАРХ были обнаружены в 9,0% (CI95% 5,3–14,7%) образцов, и наиболее частой была мутация S83I (53,8% [CI95% 29,1–76,8]). Двойная резистентность была обнаружена в 5,5% (CI95% 2,8-10,5) образцов. Частота мутаций, ассоциированных с резистентностью к макролидам и к обеим группам антибиотиков значительно возросла со временем: с 0% в 2007-2008 до 25% ( $P_{trend}$  0,0009) и 10% ( $P_{trend}$  0,0447) в 2018-2020,

соответственно. Частота мутаций, ассоциированных с резистентностью к хинолонам, возросла с 0 до 13%, но различия не достигли статистической значимости ( $P_{trend}$  0,0605),.

**Выводы** Быстрый рост резистентности MG к антимикробным препаратам в Санкт-Петербурге, особенно заметный для МАРМ, требует внедрения в России терапии, основанной на результатах определения МАРМ. Первый коммерческий тест для одновременного определения резистентности к макролидам и хинолонам, AmpliSens *M. genitalium*-ML / FQ-Resist-FL, высокочувствителен и высокоспецифичен для обнаружения МАРМ и МАРХ, и может применяться в терапевтических схемах, основанных на результатах определения МАРМ, и, вероятно, для надзора за МАРХ. Необходимы международный мониторинг мутаций в MG, связанных с резистентностью к антимикробным препаратам, дальнейшие исследования клинической значимости ряда мутаций в гене *parC* и разработка новых препаратов.

**Ключевые слова:** *Mycoplasma genitalium*, мутации, определяющие резистентность к макролидам и фторхинолонам, 23S рРНК, *parC*, тест AmpliSens *M. genitalium*-ML / FQ-Resist-FL.
